# Supplementary material for: Joint single-cell genetic and transcriptomic analysis reveal pre-malignant SCP-like subclones in human neuroblastoma
Source: PubMed Central journal article supplement — Mol Cancer. 2024 Aug 31;23:180. doi: 10.1186/s12943-024-02091-y (PMC11365129; doi:10.1186/s12943-024-02091-y), 2024-08-31

**Figure S2A**

10x

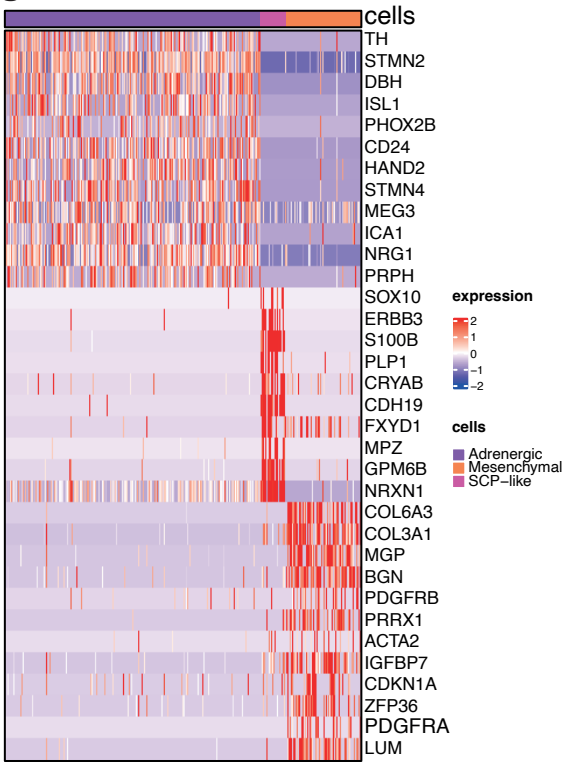**B**

DNTR-seq

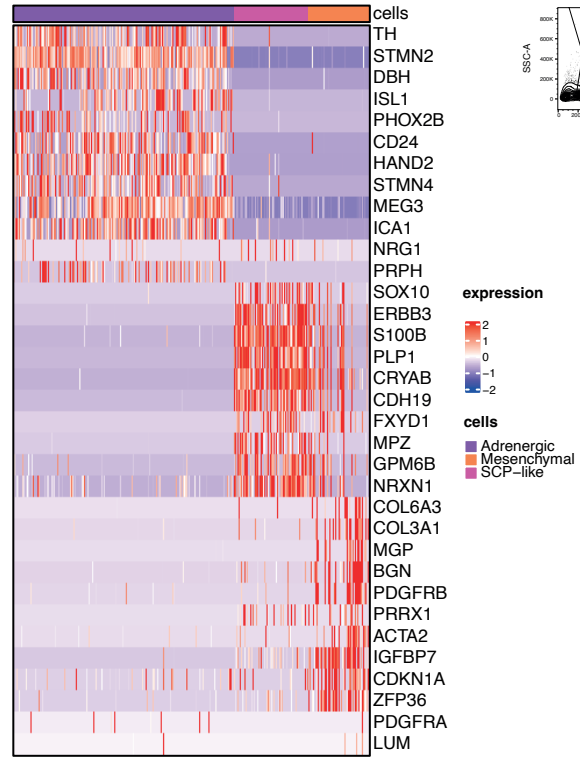**C**

FACS gating for DNTR-seq

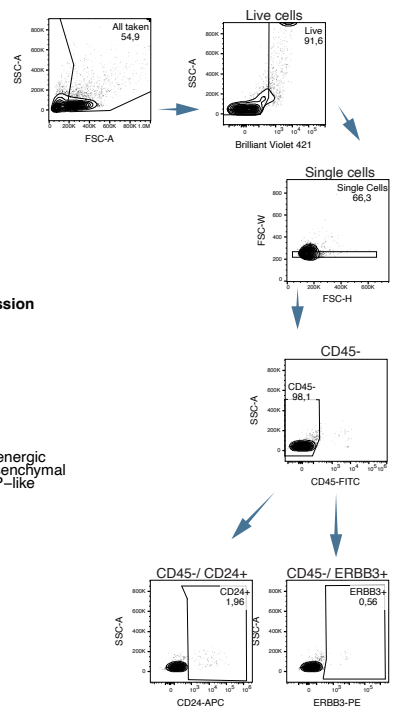**D**

Clustering-based annotation

Label transfer annotation

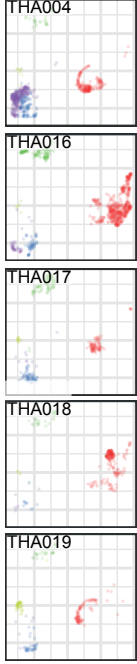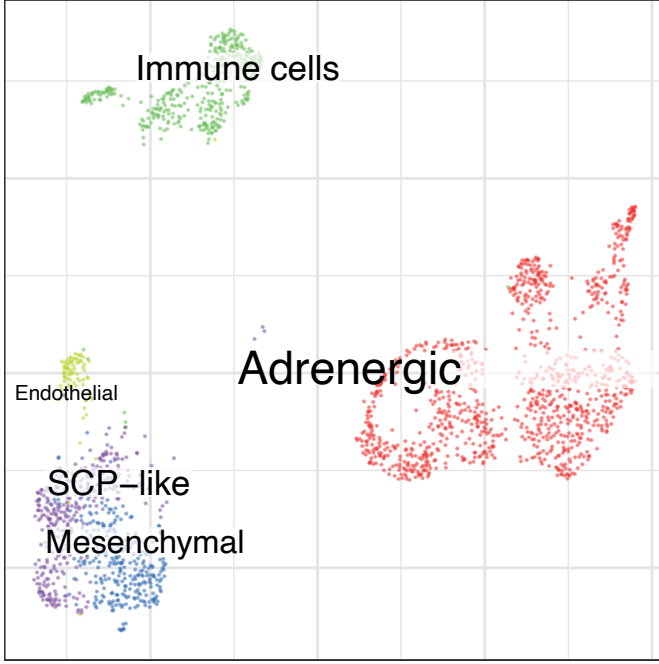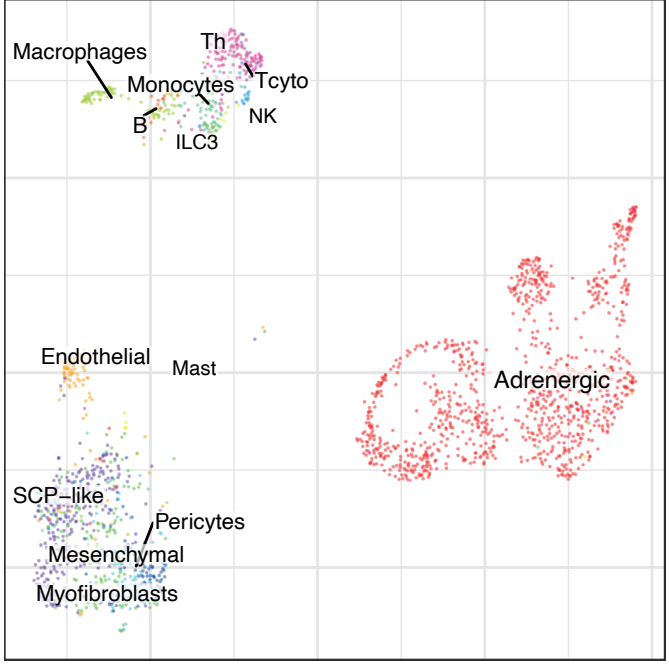**E**

Label transfer: 10x cells

Label transfer: DNTR-seq cells

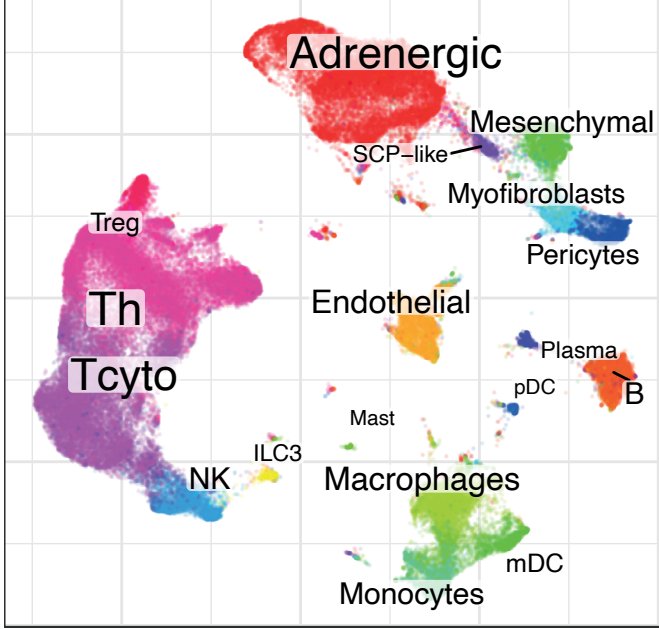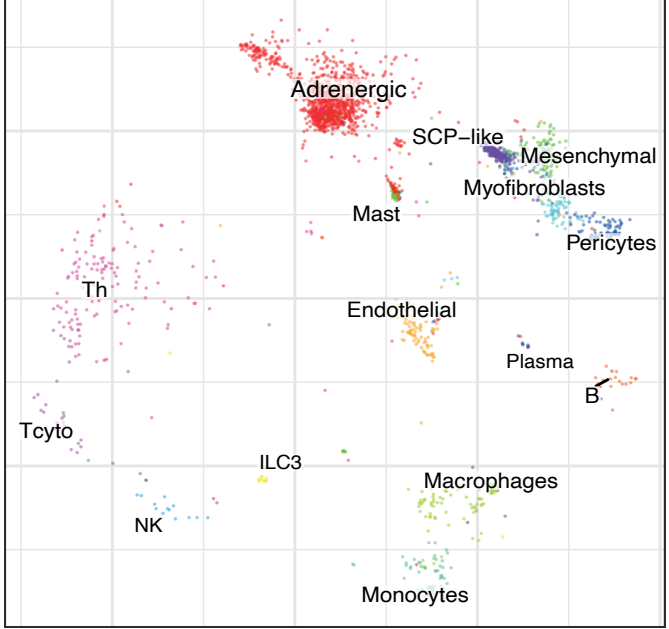

Supplement: 12943_2024_2091_MOESM2_ESM.pdf [file 12943_2024_2091_MOESM2_ESM.pdf]
