# Supplementary figures and images for: Joint single-cell genetic and transcriptomic analysis reveal pre-malignant SCP-like subclones in human neuroblastoma
Source: PubMed Central journal article supplement — Mol Cancer. 2024 Aug 31;23:180. doi: 10.1186/s12943-024-02091-y (PMC11365129; doi:10.1186/s12943-024-02091-y), 2024-08-31

# Figure S1A

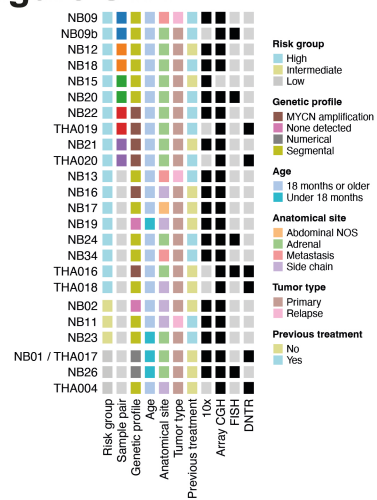

# B

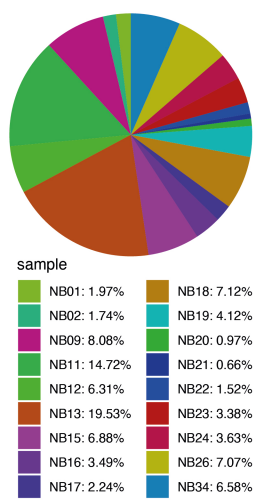

# C

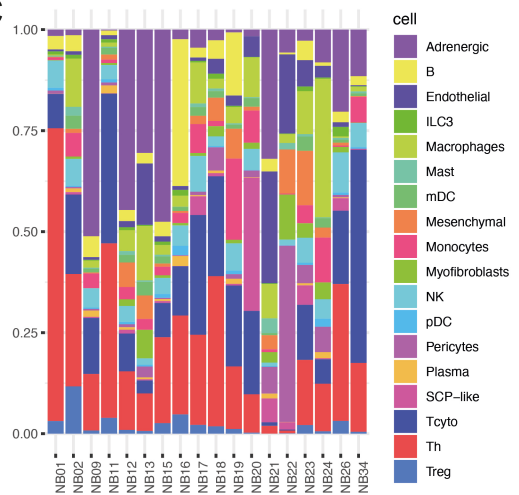

# D

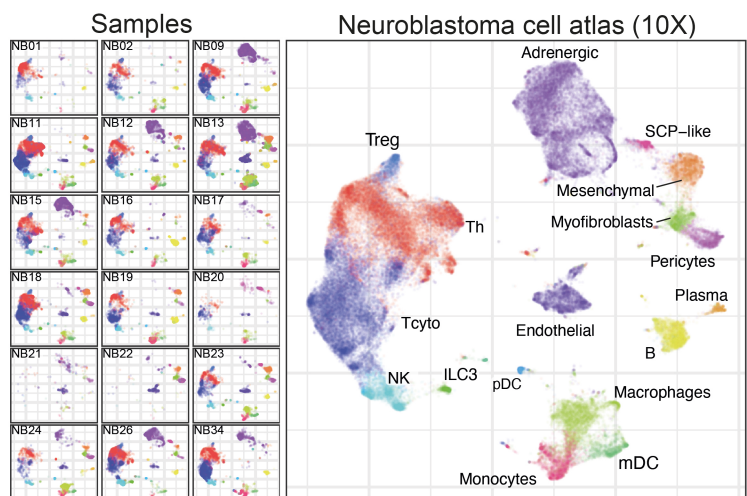

# E

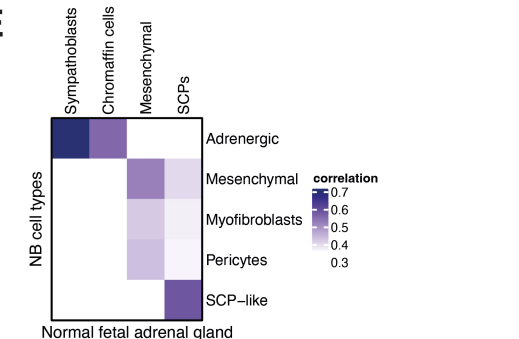

# F

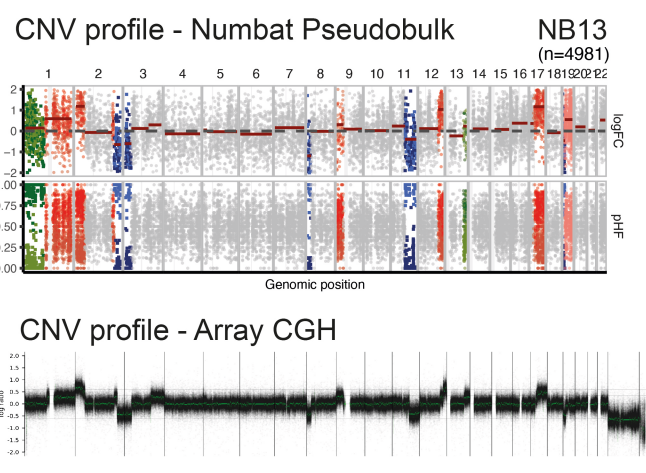

# H

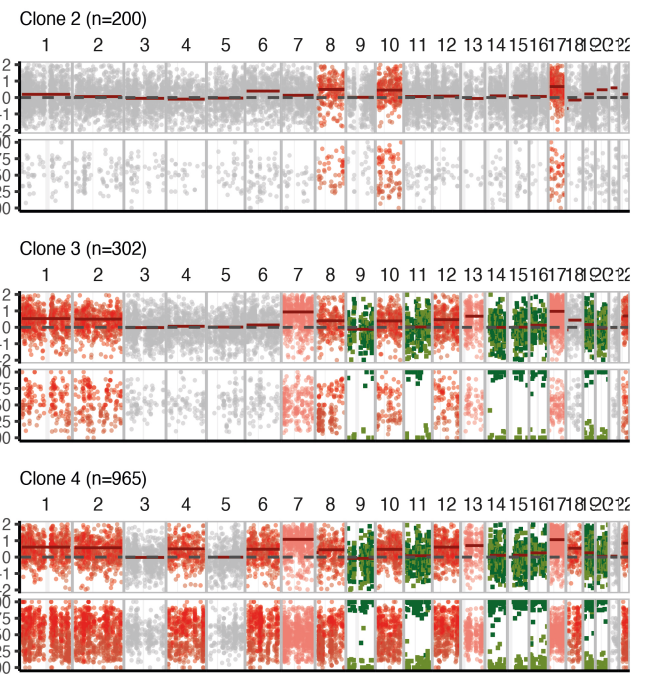

# G

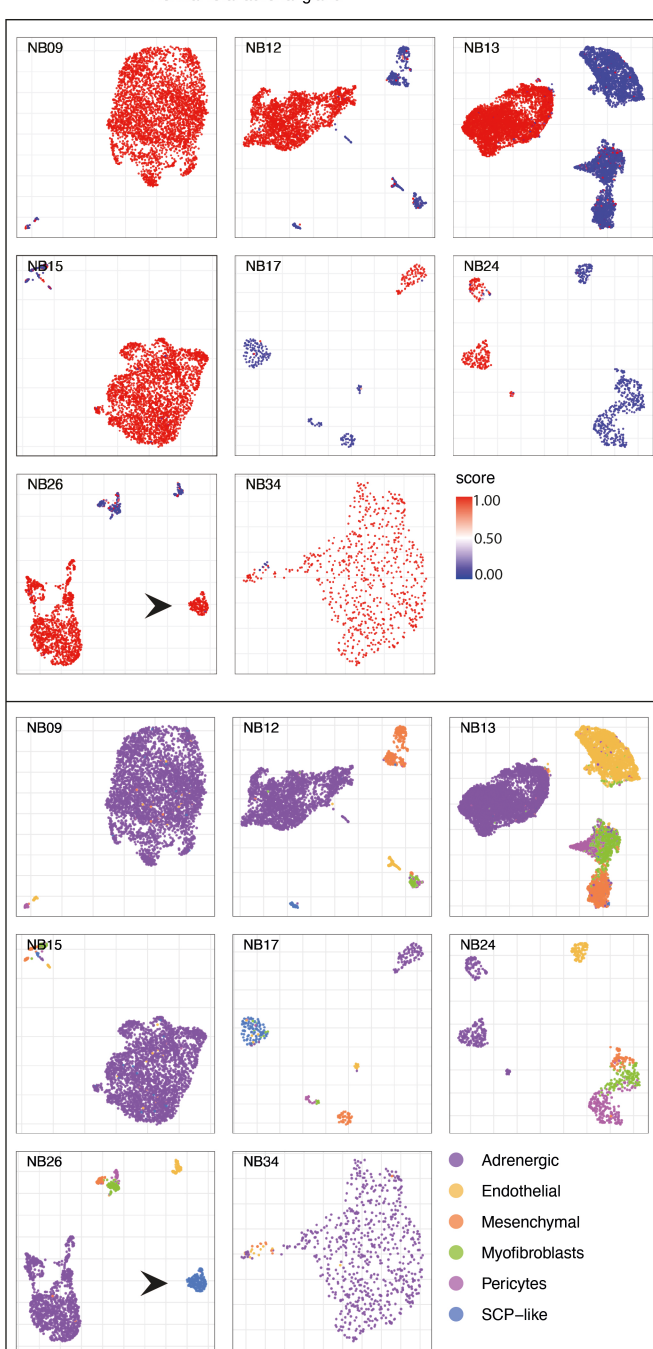

Supplement: 12943_2024_2091_MOESM1_ESM.pdf [file 12943_2024_2091_MOESM1_ESM.pdf]

**Figure S3A**

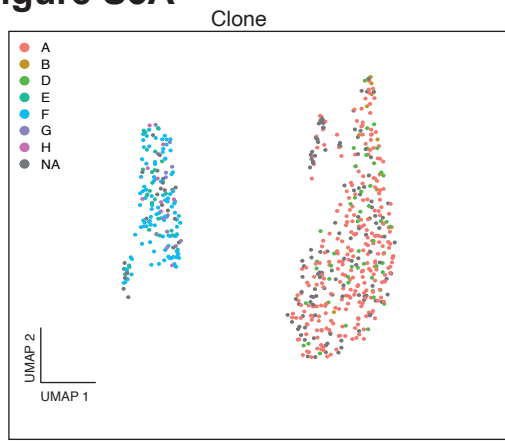

**B**

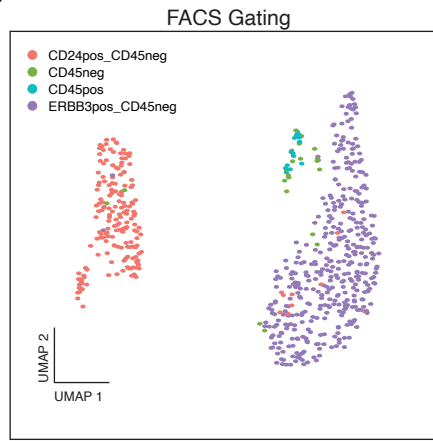

**C**

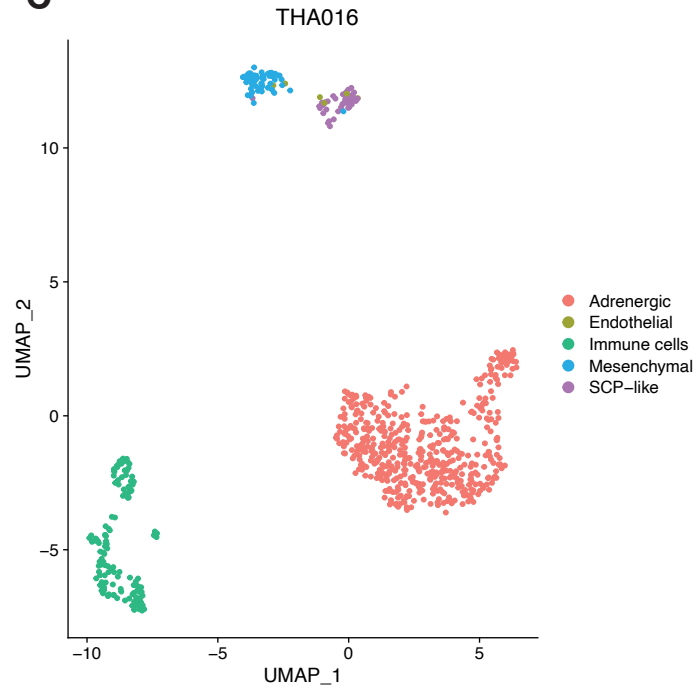

**D**

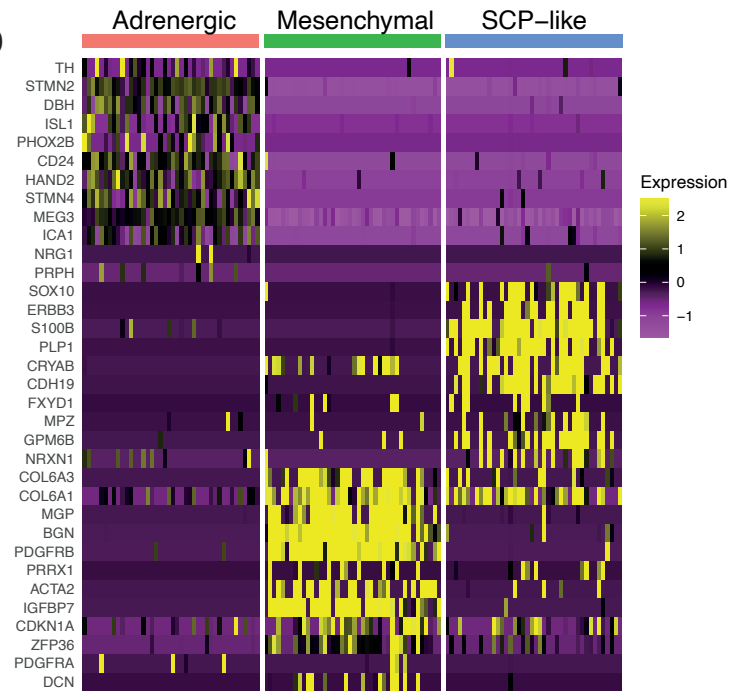

**E**

**THA004 ERBB3+ cells, clustering-based annotation**

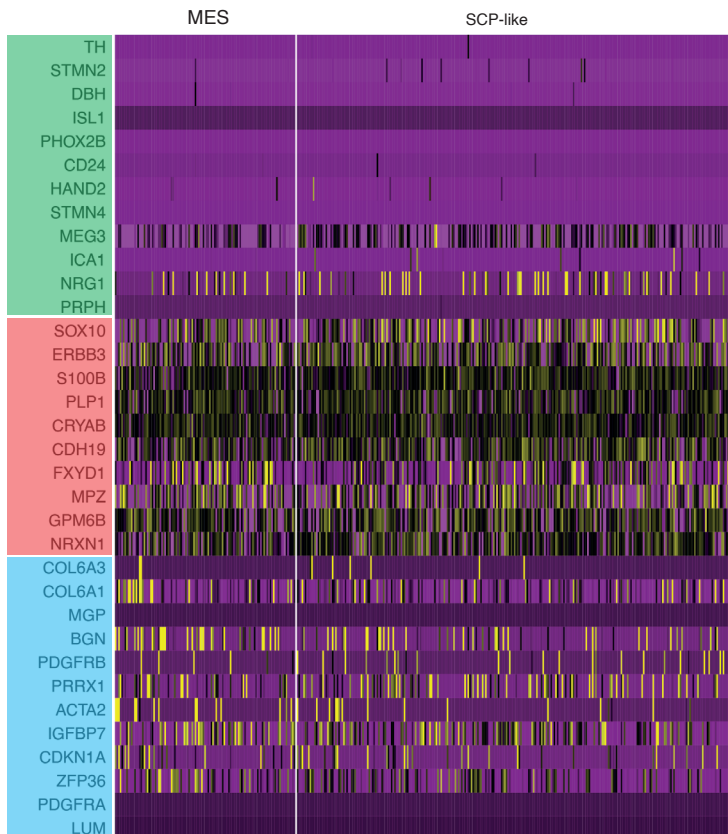

**F**

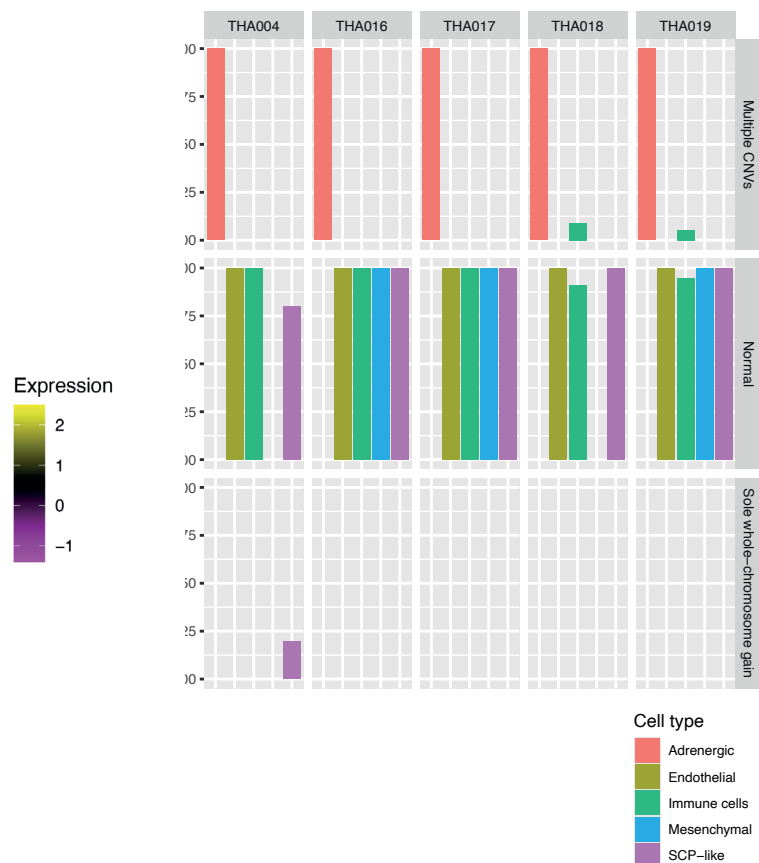

Supplement: 12943_2024_2091_MOESM3_ESM.pdf [file 12943_2024_2091_MOESM3_ESM.pdf]

**Figure S4A**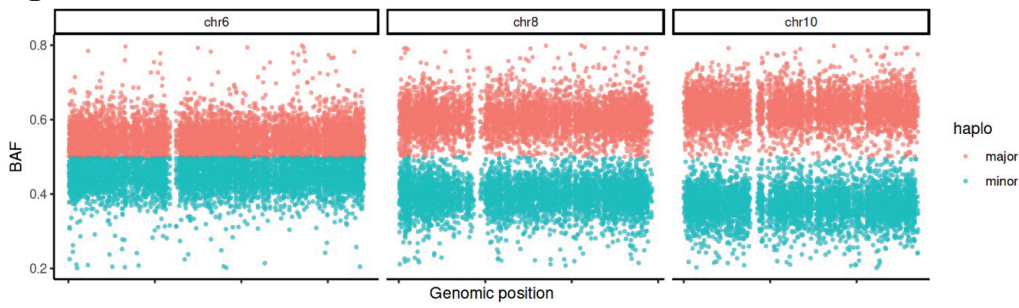**B**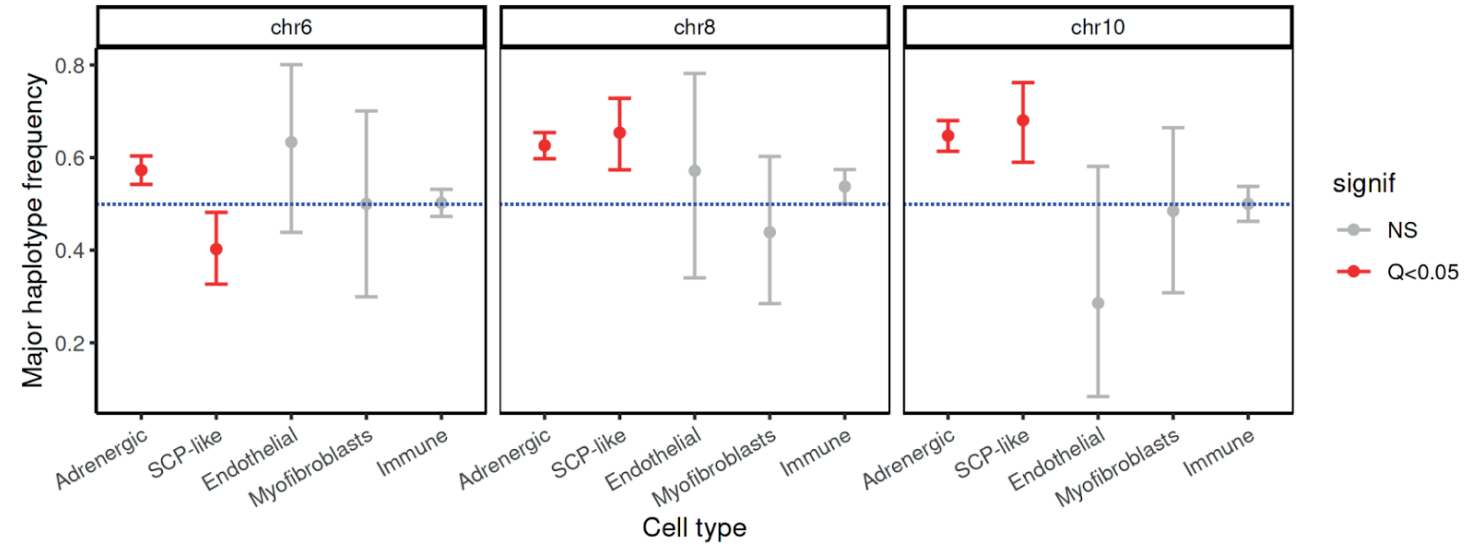**C**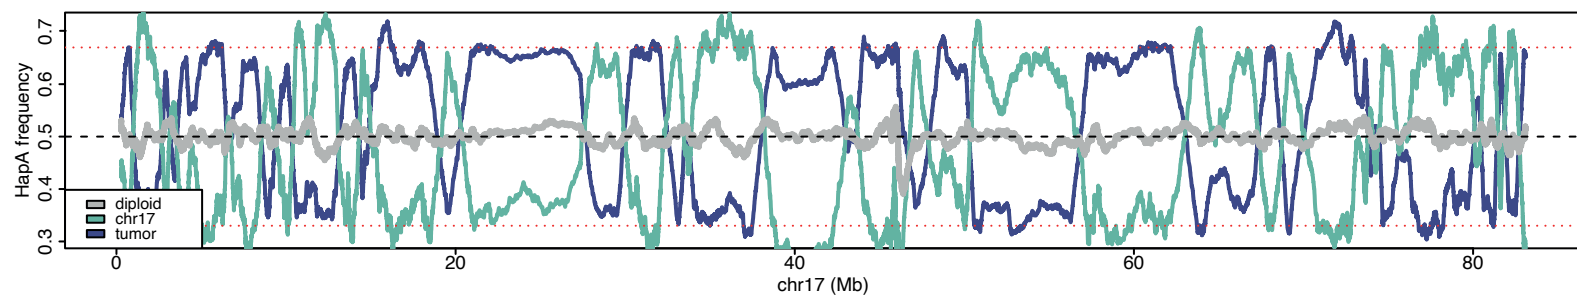**D**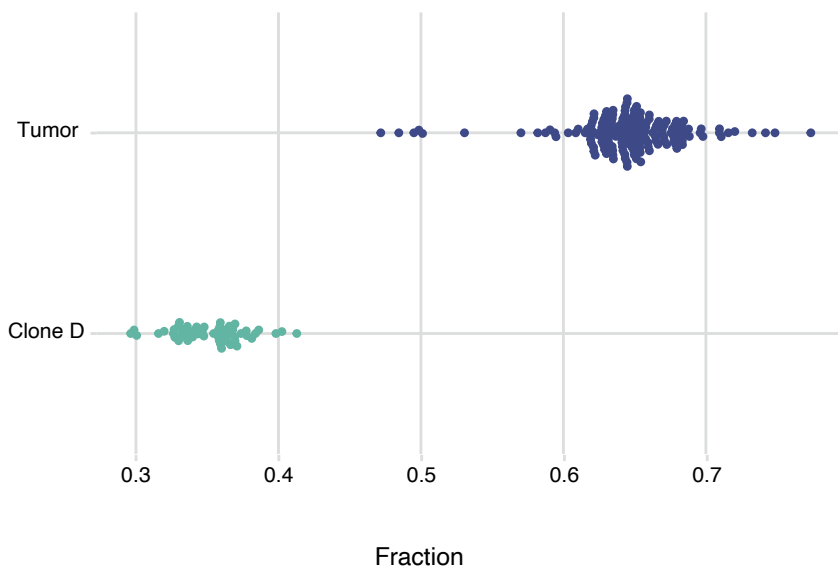

Supplement: 12943_2024_2091_MOESM4_ESM.pdf [file 12943_2024_2091_MOESM4_ESM.pdf]

**Figure S5A**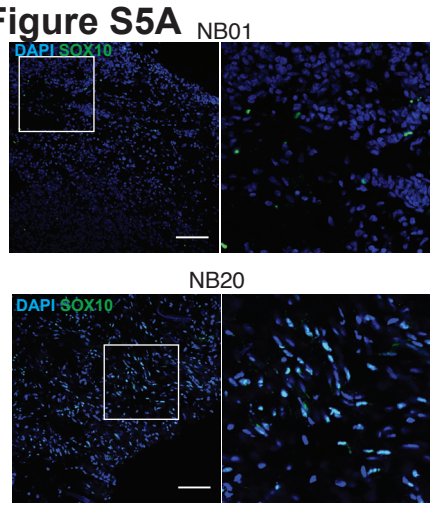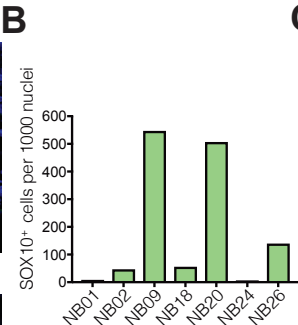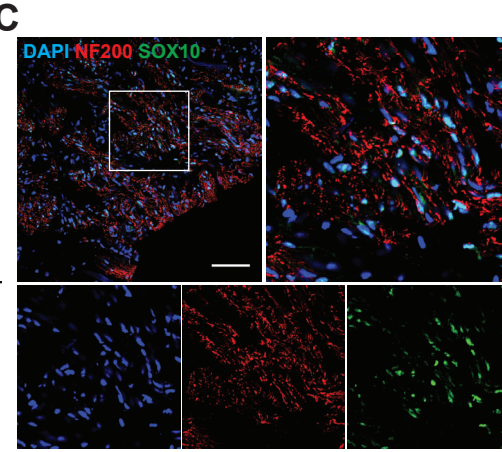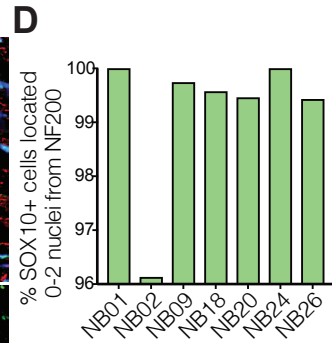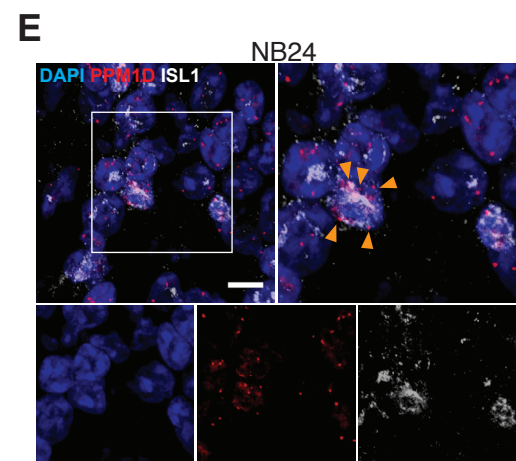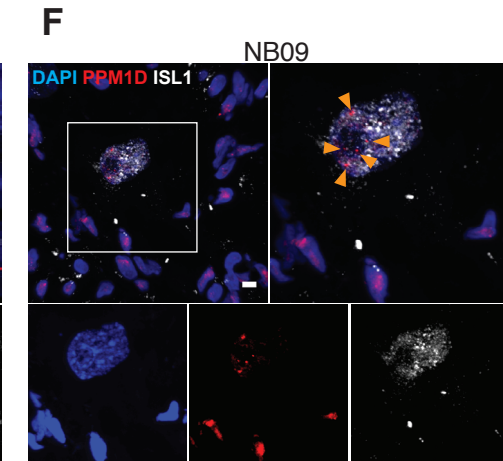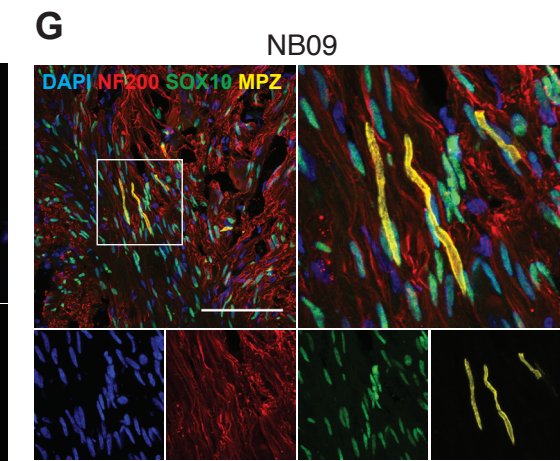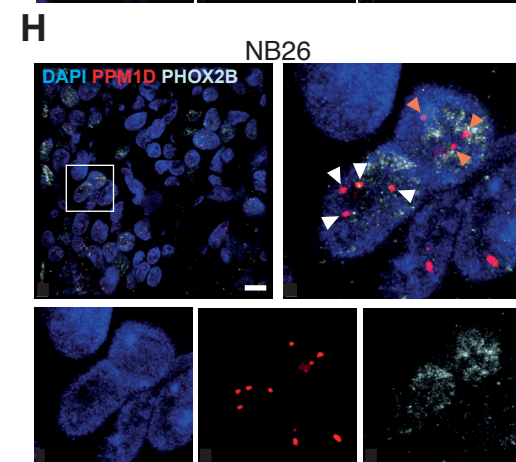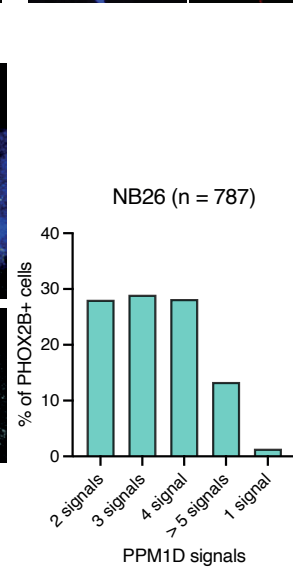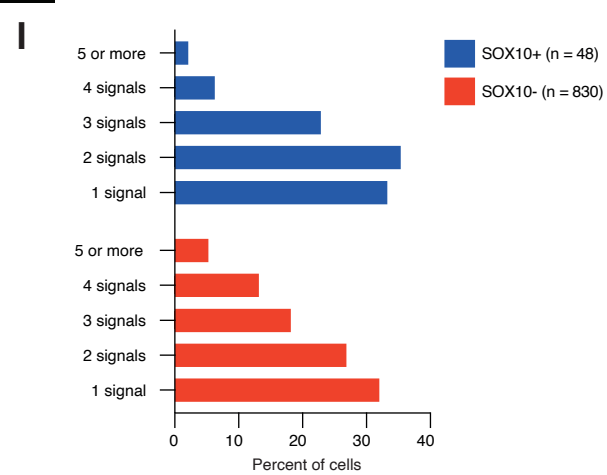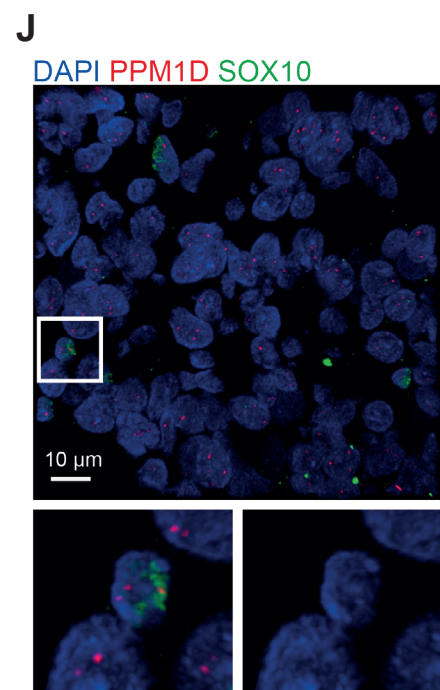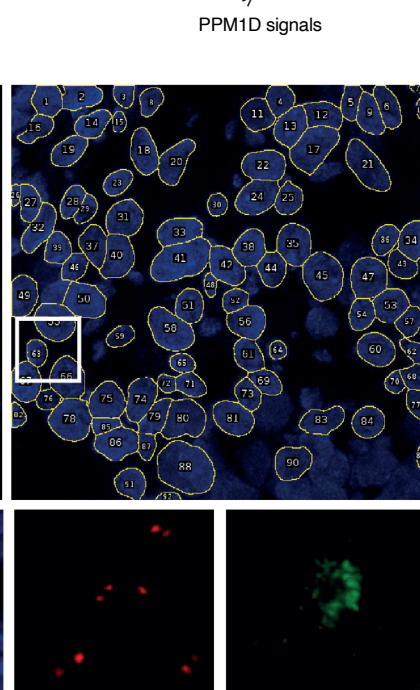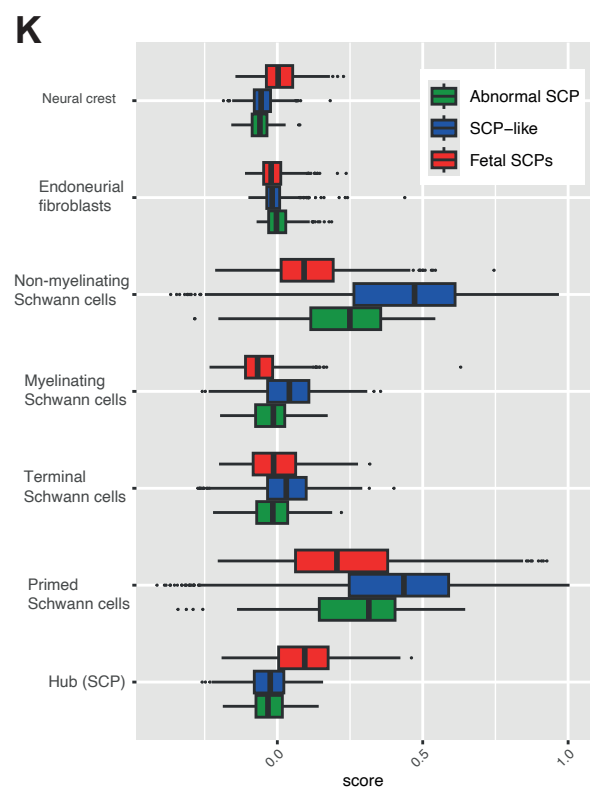

Supplement: 12943_2024_2091_MOESM5_ESM.pdf [file 12943_2024_2091_MOESM5_ESM.pdf]

Figure S6

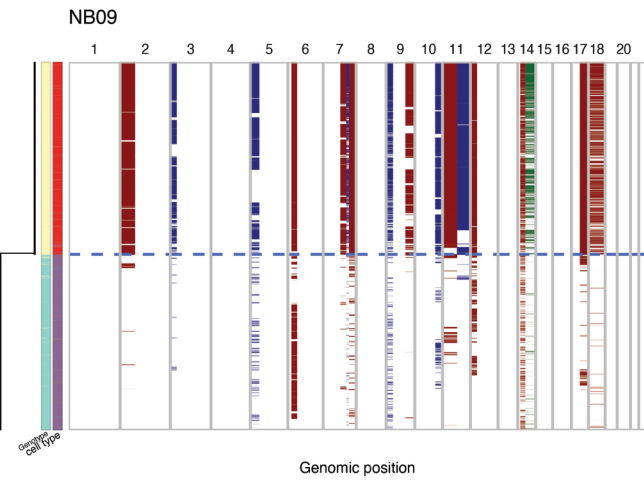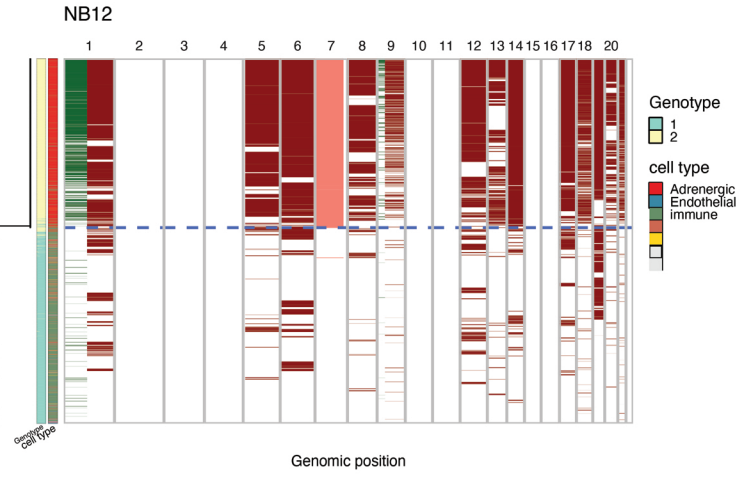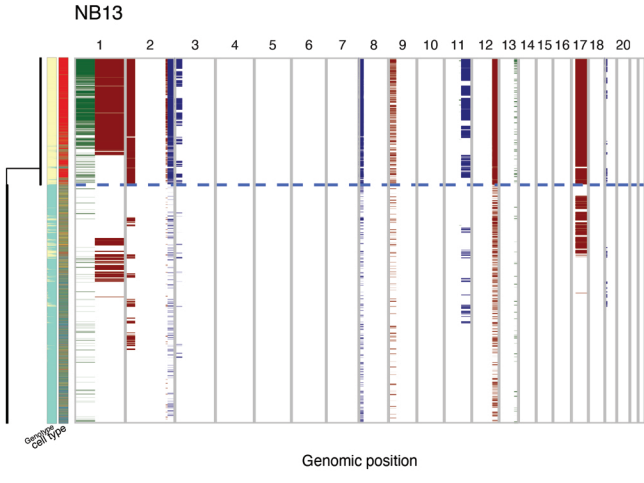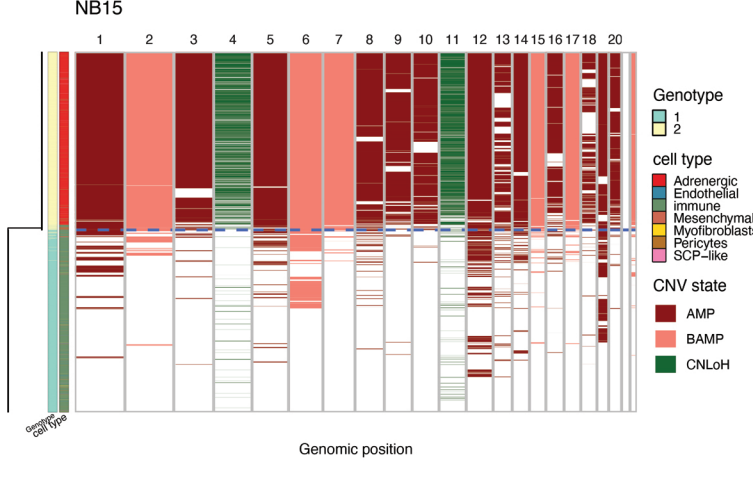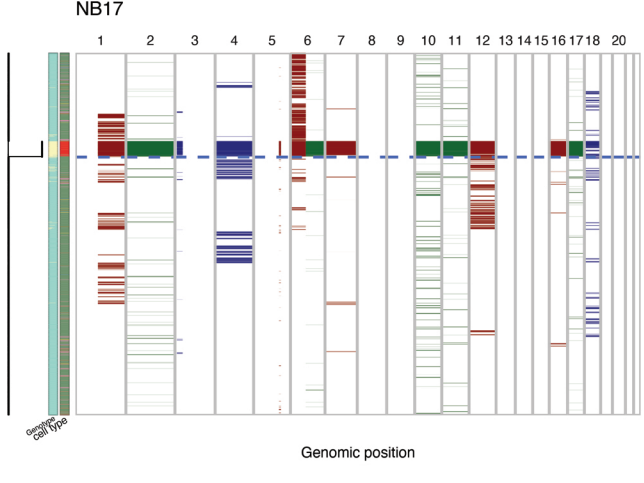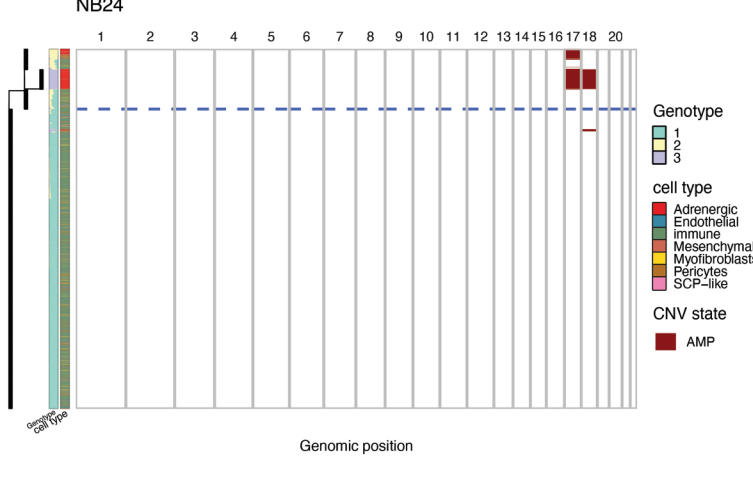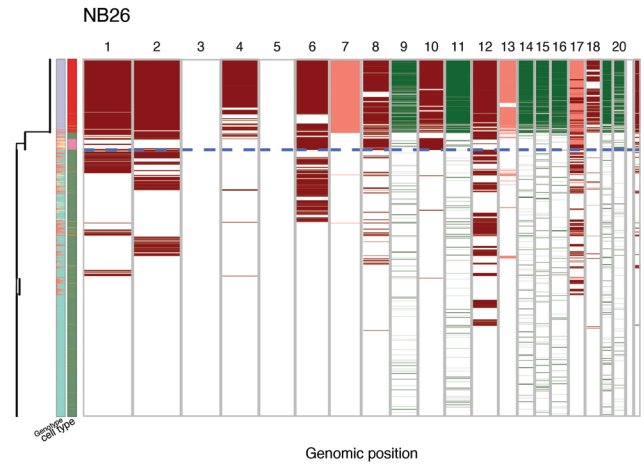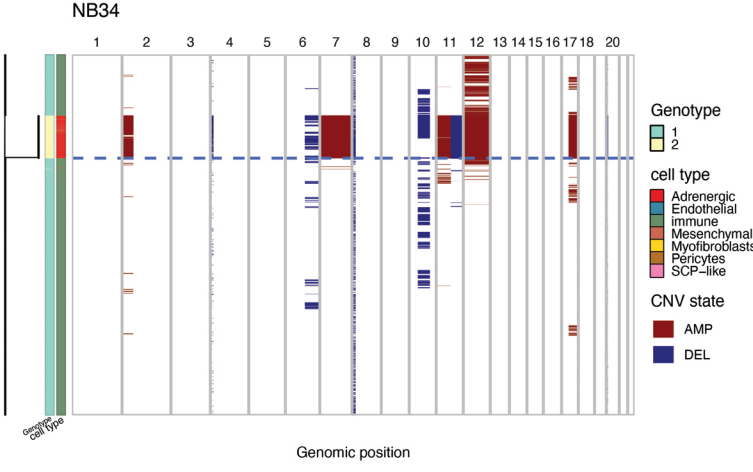

Supplement: 12943_2024_2091_MOESM6_ESM.pdf [file 12943_2024_2091_MOESM6_ESM.pdf]

Figure S7

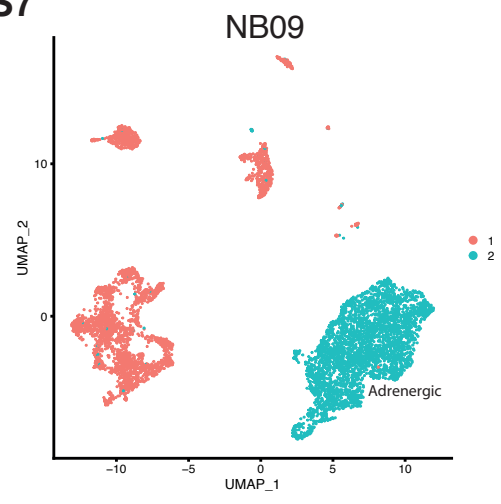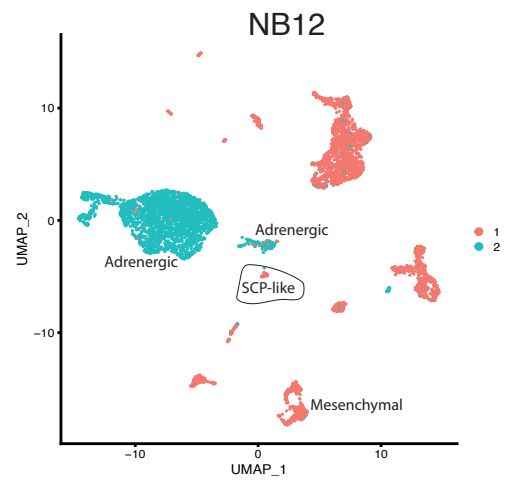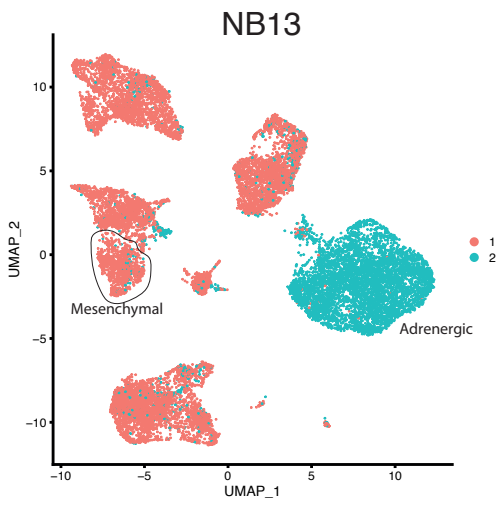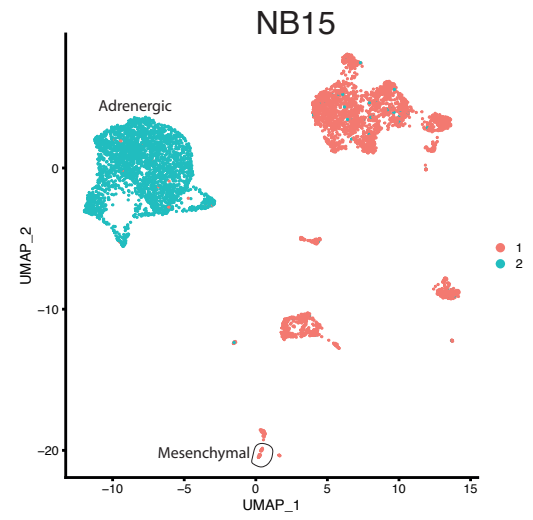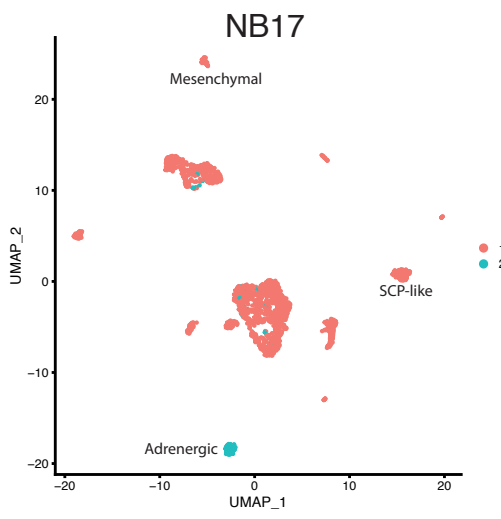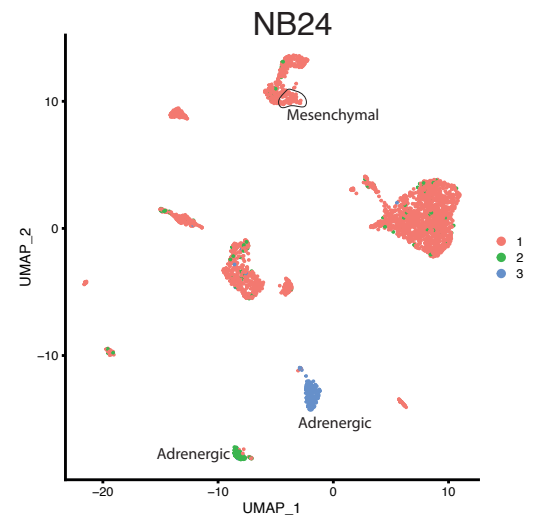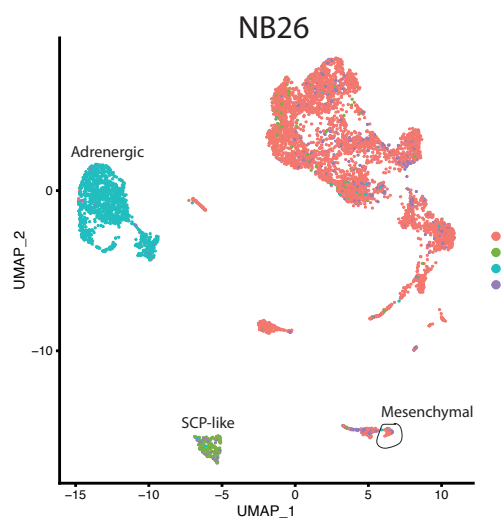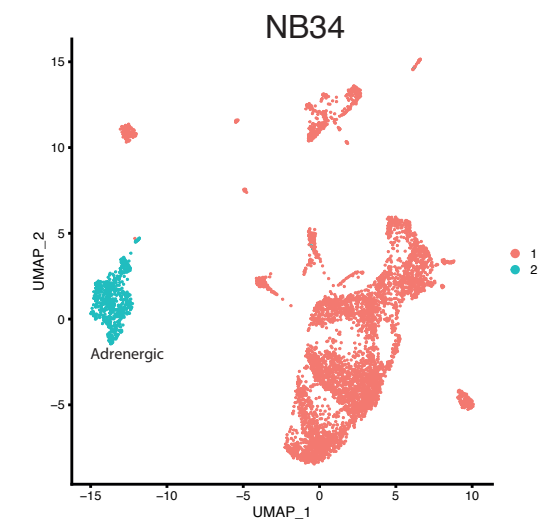

Supplement: 12943_2024_2091_MOESM7_ESM.pdf [file 12943_2024_2091_MOESM7_ESM.pdf]
